# Supplementary material for: Identifying MicroRNAs and Transcript Targets in Jatropha Seeds
Source: PLOS journal article supplement (doi:10.1371/journal.pone.0083727), 2014-02-13

**Figure S2. Predicted secondary structures of known miRNA precursors in *J. curcas*.** Locations and expressions of small RNAs mapped onto these precursors are presented. Read sequences corresponding to miRNA candidates, which are located in the 5p and 3p arms and labeled in red and purple, respectively. Values on the left side of the miRNA sequences represent the miRNA length (Jn) and read counts (x n) in the mature seed library

## Jcu MIR157

|                      |        |                                                                                                                       |
|----------------------|--------|-----------------------------------------------------------------------------------------------------------------------|
| 1 Jcu_miRNA157       | 100.0% | ATTTTGTGACAGAAGATAGAGAGCACTGATGATGATATGCAAAATTAATCAATTAATGGGCTCTCTCTCTTCTCTGCATTTCACTCTTCTGTGCTCTCTATGCTTCTGTCATCACCT |
| 2 J22_1751527_x8     | 100.0% | -----TTCTGTGCTCTCTATGCTTCTG-----                                                                                      |
| 3 J20_191301_x39     | 100.0% | -----GCTCTCTATGCTTCTGTCAT-----                                                                                        |
| 4 J21_1529060_x1069  | 100.0% | -----GCTCTCTATGCTTCTGTCATC-----                                                                                       |
| 5 J22_1636813_x27    | 100.0% | -----GCTCTCTATGCTTCTGTCATCA-----                                                                                      |
| 6 J21_2419849_x1     | 100.0% | -----CTCTCTATGCTTCTGTCATCA-----                                                                                       |
| 7 J20_216262_x6      | 100.0% | -----CTCTCTATGCTTCTGTCATC-----                                                                                        |
| 8 J19_161765_x60     | 100.0% | -----GCTCTCTATGCTTCTGTC-----                                                                                          |
| 9 J19_193920_x2      | 100.0% | -----TCTCTATGCTTCTGTCATC-----                                                                                         |
| 10 J18_145130_x3     | 100.0% | -----CTCTCTATGCTTCTGTC-----                                                                                           |
| 11 J18_146021_x3     | 100.0% | -----GCTCTCTATGCTTCTGTC-----                                                                                          |
| 12 J18_202918_x1     | 100.0% | -----CTCTATGCTTCTGTCATC-----                                                                                          |
| 13 J20_329851_x1     | 100.0% | -----TGTGACAGAAGATAGAGAG-----                                                                                         |
| 14 J21_1929132_x39   | 100.0% | -----TGTGACAGAAGATAGAGAGC-----                                                                                        |
| 15 J19_178779_x7     | 100.0% | -----TTGACAGAAGATAGAGAGC-----                                                                                         |
| 16 J20_170276_x144   | 100.0% | -----TTGACAGAAGATAGAGAGCA-----                                                                                        |
| 17 J21_1228639_x4732 | 100.0% | -----TTGACAGAAGATAGAGAGCAC-----                                                                                       |
| 18 J22_1356637_x351  | 100.0% | -----TTGACAGAAGATAGAGAGCACT-----                                                                                      |
| 19 J21_2080381_x7    | 100.0% | -----TGACAGAAGATAGAGAGCACT-----                                                                                       |
| 20 J20_294741_x1     | 100.0% | -----GACAGAAGATAGAGAGCACT-----                                                                                        |
| 21 J20_184868_x60    | 100.0% | -----TGACAGAAGATAGAGAGCAC-----                                                                                        |
| 22 J19_173200_x15    | 100.0% | -----TGACAGAAGATAGAGAGCA-----                                                                                         |
| 23 J18_128682_x44    | 100.0% | -----GACAGAAGATAGAGAGCA-----                                                                                          |
| 24 J19_184532_x3     | 100.0% | -----GACAGAAGATAGAGAGCAC-----                                                                                         |
| 25 J18_138885_x8     | 100.0% | -----TTGACAGAAGATAGAGAG-----                                                                                          |

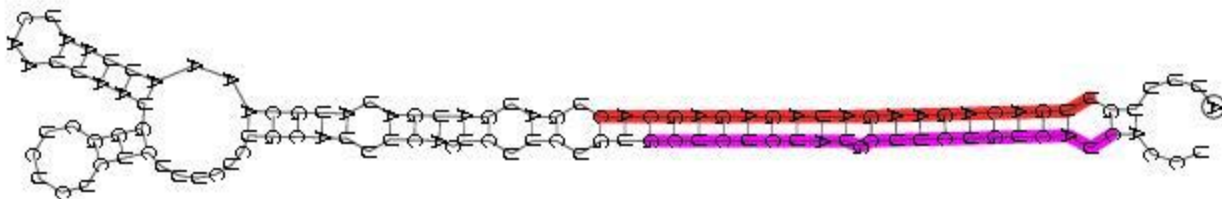

Jcu MIR156a

|    |                   |        |                                                                                                                        |
|----|-------------------|--------|------------------------------------------------------------------------------------------------------------------------|
| 1  | Jcu_miRNA156a     | 100.0% | TTCTGGGACACAGAAATTGACAGAAAGAGAGTGAGCACACAGAGGCATTTGTATAAAATCTATACCGTTGCTTTTTCGCGTGCTCACTTCTCTTTCTGTCAAGTTTCCAGCGCCGGAA |
| 2  | J25_233918_x1     | 100.0% | -----GTGCTCACTTCTCTTTCTGTCAAGTT-----                                                                                   |
| 3  | J24_1945121_x3    | 100.0% | -----GTGCTCACTTCTCTTTCTGTCAAGT-----                                                                                    |
| 4  | J24_191180_x53    | 100.0% | -----TGCTCACTTCTCTTTCTGTCAAGTT-----                                                                                    |
| 5  | J23_483767_x3     | 100.0% | -----GTGCTCACTTCTCTTTCTGTCAAG-----                                                                                     |
| 6  | J23_305455_x609   | 100.0% | -----TGCTCACTTCTCTTTCTGTCAAGT-----                                                                                     |
| 7  | J23_278978_x2748  | 100.0% | -----GCTCACTTCTCTTTCTGTCAAGTT-----                                                                                     |
| 8  | J24_526345_x17    | 100.0% | -----GCTCACTTCTCTTTCTGTCAAGTTT-----                                                                                    |
| 9  | J25_55967_x10     | 100.0% | -----GCTCACTTCTCTTTCTGTCAAGTTTC-----                                                                                   |
| 10 | J22_2023022_x1    | 100.0% | -----CTCACTTCTCTTTCTGTCAAGTT-----                                                                                      |
| 11 | J22_1461591_x129  | 100.0% | -----GTGCTCACTTCTCTTTCTGTCA-----                                                                                       |
| 12 | J22_1460425_x130  | 100.0% | -----TGCTCACTTCTCTTTCTGTCAAG-----                                                                                      |
| 13 | J22_1229332_x5519 | 100.0% | -----GCTCACTTCTCTTTCTGTCAAGT-----                                                                                      |
| 14 | J21_2236809_x2    | 100.0% | -----CTCACTTCTCTTTCTGTCAAGT-----                                                                                       |
| 15 | J23_1057311_x1    | 100.0% | -----GCGTGCTCACTTCTCTTTCTGTCA-----                                                                                     |
| 16 | J22_1478001_x110  | 100.0% | -----CGTGCTCACTTCTCTTTCTGTCA-----                                                                                      |
| 17 | J21_1769670_x175  | 100.0% | -----GCTCACTTCTCTTTCTGTCAAG-----                                                                                       |
| 18 | J21_2686149_x1    | 100.0% | -----GTGCTCACTTCTCTTTCTGTCA-----                                                                                       |
| 19 | J21_1994023_x19   | 100.0% | -----TGCTCACTTCTCTTTCTGTCA-----                                                                                        |
| 20 | J23_1023175_x1    | 100.0% | -----TCACTTCTCTTTCTGTCAAGTTTC-----                                                                                     |
| 21 | J22_1962047_x1    | 100.0% | -----CACTTCTCTTTCTGTCAAGTTTC-----                                                                                      |
| 22 | J20_217013_x5     | 100.0% | -----GCTCACTTCTCTTTCTGTCA-----                                                                                         |
| 23 | J20_213651_x7     | 100.0% | -----TCACTTCTCTTTCTGTCAAGT-----                                                                                        |
| 24 | J20_216196_x6     | 100.0% | -----CACTTCTCTTTCTGTCAAGTT-----                                                                                        |
| 25 | J20_260731_x1     | 100.0% | -----TGCTCACTTCTCTTTCTGTCA-----                                                                                        |
| 26 | J19_180100_x6     | 100.0% | -----GCTCACTTCTCTTTCTGTCA-----                                                                                         |
| 27 | J19_183667_x4     | 100.0% | -----CACTTCTCTTTCTGTCAAGT-----                                                                                         |
| 28 | J19_243595_x1     | 100.0% | -----ACTTCTCTTTCTGTCAAGTT-----                                                                                         |
| 29 | J18_195954_x1     | 100.0% | -----CTTCTCTTTCTGTCAAGTT-----                                                                                          |
| 30 | J18_163013_x1     | 100.0% | -----GCTCACTTCTCTTTCTGT-----                                                                                           |
| 31 | J18_140755_x6     | 100.0% | -----ACTTCTCTTTCTGTCAAGT-----                                                                                          |
| 33 | J23_355269_x30    | 100.0% | -----AATTGACAGAAGAGAGTGAGCAC-----                                                                                      |
| 34 | J22_1833704_x3    | 100.0% | -----ATTGACAGAAGAGAGTGAGCAC-----                                                                                       |
| 35 | J21_997186_x16481 | 100.0% | -----TTGACAGAAGAGAGTGAGCAC-----                                                                                        |
| 36 | J22_1807769_x4    | 100.0% | -----TTGACAGAAGAGAGTGAGCAC-----                                                                                        |
| 37 | J20_158160_x254   | 100.0% | -----TTGACAGAAGAGAGTGAGCAC-----                                                                                        |
| 38 | J20_75459_x11810  | 100.0% | -----TGACAGAAGAGAGTGAGCAC-----                                                                                         |
| 39 | J21_1850539_x87   | 100.0% | -----TGACAGAAGAGAGTGAGCAC-----                                                                                         |
| 40 | J19_162060_x57    | 100.0% | -----TTGACAGAAGAGAGTGAGC-----                                                                                          |
| 41 | J20_215890_x6     | 100.0% | -----GACAGAAGAGAGTGAGCAC-----                                                                                          |
| 42 | J19_129387_x729   | 100.0% | -----TGACAGAAGAGAGTGAGCAC-----                                                                                         |
| 43 | J19_162866_x52    | 100.0% | -----GACAGAAGAGAGTGAGCAC-----                                                                                          |
| 44 | J18_133614_x20    | 100.0% | -----TTGACAGAAGAGAGTGAG-----                                                                                           |
| 45 | J18_126662_x56    | 100.0% | -----TGACAGAAGAGAGTGAGC-----                                                                                           |
| 46 | J19_159189_x76    | 100.0% | -----ACAGAAGAGAGTGAGCAC-----                                                                                           |
| 47 | J20_192936_x35    | 100.0% | -----ACAGAAGAGAGTGAGCAC-----                                                                                           |
| 48 | J21_2275582_x1    | 100.0% | -----CAGAAGAGAGTGAGCACACAG-----                                                                                        |
| 49 | J18_149635_x2     | 100.0% | -----GACAGAAGAGAGTGAGCAC-----                                                                                          |
| 50 | J18_142156_x5     | 100.0% | -----ACAGAAGAGAGTGAGCAC-----                                                                                           |
| 51 | J18_160524_x1     | 100.0% | -----CAGAAGAGAGTGAGCAC-----                                                                                            |

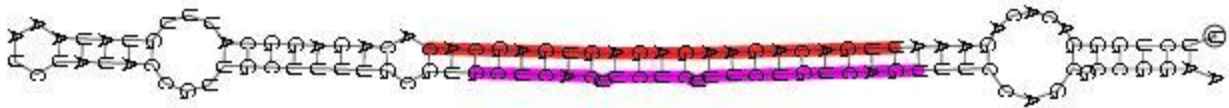

Jcu MIR156b

|    |                  |        |                                                                                                       |
|----|------------------|--------|-------------------------------------------------------------------------------------------------------|
| 1  | Jcu_miRNA156b    | 100.0% | ATTACTGAGAGAGACTGACAGAAGAGAGTGAGCACACGCAGGCAATTGTATGAGGCCATACCATTGTAGTGATGTGTGCTCACCTCTCTTCTGTGCATCTT |
| 2  | J22_1591836_x40  | 100.0% | -----TGCTCACCTCTCTTCTGTGCATC---                                                                       |
| 3  | J22_1983613_x1   | 100.0% | -----GCTCACCTCTCTTCTGTGCATCT-                                                                         |
| 4  | J19_217458_x1    | 100.0% | -----GCTCACCTCTCTTCTGTCA----                                                                          |
| 5  | J21_1956142_x30  | 100.0% | -----CTGACAGAAGAGAGTGAGCAC-----                                                                       |
| 6  | J20_75459_x11810 | 100.0% | -----TGACAGAAGAGAGTGAGCAC-----                                                                        |
| 7  | J21_1850539_x87  | 100.0% | -----TGACAGAAGAGAGTGAGCACA-----                                                                       |
| 8  | J20_215890_x6    | 100.0% | -----GACAGAAGAGAGTGAGCACA-----                                                                        |
| 9  | J19_162866_x52   | 100.0% | -----GACAGAAGAGAGTGAGCAC-----                                                                         |
| 10 | J19_129387_x729  | 100.0% | -----TGACAGAAGAGAGTGAGCA-----                                                                         |
| 11 | J18_126662_x56   | 100.0% | -----TGACAGAAGAGAGTGAGC-----                                                                          |
| 12 | J19_159189_x76   | 100.0% | -----ACAGAAGAGAGTGAGCACA-----                                                                         |
| 13 | J20_192936_x35   | 100.0% | -----ACAGAAGAGAGTGAGCACAC-----                                                                        |
| 14 | J18_142156_x5    | 100.0% | -----ACAGAAGAGAGTGAGCAC-----                                                                          |
| 15 | J18_149635_x2    | 100.0% | -----GACAGAAGAGAGTGAGCA-----                                                                          |
| 16 | J18_160524_x1    | 100.0% | -----CAGAAGAGAGTGAGCACA-----                                                                          |

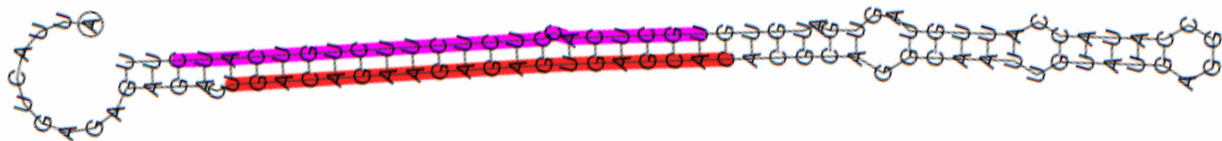

Jcu MIR156c

|    |                  |        |                                                                                                       |
|----|------------------|--------|-------------------------------------------------------------------------------------------------------|
| 1  | Jcu_miRNA156c    | 100.0% | GGAGGGTGACAGAAGAGAGTGAGCACACATGGTTTTCTTGCATTTCATACTTCATGCTCGTAGCTCTGCGTGCTCACCTCTATCTGTCCATCCACCTCTCT |
| 2  | J22_1951587_x1   | 100.0% | -----ACAGAAGAGAGTGAGCACACAT-----                                                                      |
| 3  | J21_2195375_x2   | 100.0% | -----CAGAAGAGAGTGAGCACACAT-----                                                                       |
| 4  | J20_192936_x35   | 100.0% | -----ACAGAAGAGAGTGAGCACAC-----                                                                        |
| 5  | J20_224604_x3    | 100.0% | -----GTGACAGAAGAGAGTGAGCA-----                                                                        |
| 6  | J21_1965158_x27  | 100.0% | -----GTGACAGAAGAGAGTGAGCAC-----                                                                       |
| 7  | J20_75459_x11810 | 100.0% | -----TGACAGAAGAGAGTGAGCAC-----                                                                        |
| 8  | J21_1850539_x87  | 100.0% | -----TGACAGAAGAGAGTGAGCACA-----                                                                       |
| 9  | J20_215890_x6    | 100.0% | -----GACAGAAGAGAGTGAGCACA-----                                                                        |
| 10 | J19_162866_x52   | 100.0% | -----GACAGAAGAGAGTGAGCAC-----                                                                         |
| 11 | J19_159189_x76   | 100.0% | -----ACAGAAGAGAGTGAGCACA-----                                                                         |
| 12 | J18_149635_x2    | 100.0% | -----GACAGAAGAGAGTGAGCA-----                                                                          |
| 13 | J18_142156_x5    | 100.0% | -----ACAGAAGAGAGTGAGCAC-----                                                                          |
| 14 | J19_129387_x729  | 100.0% | -----TGACAGAAGAGAGTGAGCA-----                                                                         |
| 15 | J18_160524_x1    | 100.0% | -----CAGAAGAGAGTGAGCACA-----                                                                          |
| 16 | J18_126662_x56   | 100.0% | -----TGACAGAAGAGAGTGAGC-----                                                                          |

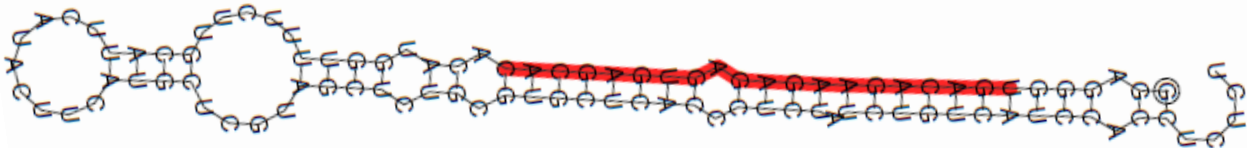

# Jcu MIR159

|                      |        |                                                                                                                                                                                                                |
|----------------------|--------|----------------------------------------------------------------------------------------------------------------------------------------------------------------------------------------------------------------|
| 1 Jcu_miRNA159       | 100.0% | AGGGTTAAGGAGTGGAGCTCCTTGAAGTCCAATAGAGGATCTTGCTAGGTTAGATTAAGCTGCTAAGCTATGCATCCCATAGCCCTATCCCATCTTGAAGAATATTTTATTGGATAGGCTTATGGCTTTCTTTTCTCAGGAGCTTTTTTACCTAACGTTAGATCCTTTTTTGGATTGAAGGGAGCTCTACACATCTCCCTCTTACA |
| 2 J25_193270_x1      | 100.0% | -----GTGGAGCTCCTTGAAGTCCAATAGA-----                                                                                                                                                                            |
| 3 J22_1457279_x132   | 100.0% | -----GAGCTCCTTGAAGTCCAATAGA-----                                                                                                                                                                               |
| 4 J21_2000167_x18    | 100.0% | -----GAGCTCCTTGAAGTCCAATAG-----                                                                                                                                                                                |
| 5 J21_1856235_x83    | 100.0% | -----AGCTCCTTGAAGTCCAATAGA-----                                                                                                                                                                                |
| 6 J20_184628_x60     | 100.0% | -----GAGCTCCTTGAAGTCCAATA-----                                                                                                                                                                                 |
| 7 J19_186230_x3      | 100.0% | -----GAGCTCCTTGAAGTCCAAT-----                                                                                                                                                                                  |
| 8 J21_2424651_x1     | 100.0% | -----TTTGTGGATTGAAGGGAGCTC-----                                                                                                                                                                                |
| 9 J20_142107_x512    | 100.0% | -----TTTGGATTGAAGGGAGCTCT-----                                                                                                                                                                                 |
| 10 J21_802764_x49102 | 100.0% | -----TTTGGATTGAAGGGAGCTCTA-----                                                                                                                                                                                |
| 11 J22_1537092_x65   | 100.0% | -----TTTGGATTGAAGGGAGCTCTAC-----                                                                                                                                                                               |
| 12 J23_397817_x10    | 100.0% | -----TTTGGATTGAAGGGAGCTCTACA-----                                                                                                                                                                              |
| 13 J24_5586869_x1    | 100.0% | -----TTTGGATTGAAGGGAGCTCTACAC-----                                                                                                                                                                             |
| 14 J22_1831478_x3    | 100.0% | -----TTGGATTGAAGGGAGCTCTACA-----                                                                                                                                                                               |
| 15 J21_2172021_x3    | 100.0% | -----TTGGATTGAAGGGAGCTCTAC-----                                                                                                                                                                                |
| 16 J20_137410_x668   | 100.0% | -----TTGGATTGAAGGGAGCTCTA-----                                                                                                                                                                                 |
| 17 J19_176573_x10    | 100.0% | -----TTGGATTGAAGGGAGCTCT-----                                                                                                                                                                                  |
| 18 J19_159856_x73    | 100.0% | -----TTTGGATTGAAGGGAGCTC-----                                                                                                                                                                                  |
| 19 J19_166699_x33    | 100.0% | -----TGGATTGAAGGGAGCTCTA-----                                                                                                                                                                                  |
| 20 J18_138941_x8     | 100.0% | -----GGATTGAAGGGAGCTCTA-----                                                                                                                                                                                   |
| 21 J18_108615_x426   | 100.0% | -----TTTGGATTGAAGGGAGCT-----                                                                                                                                                                                   |

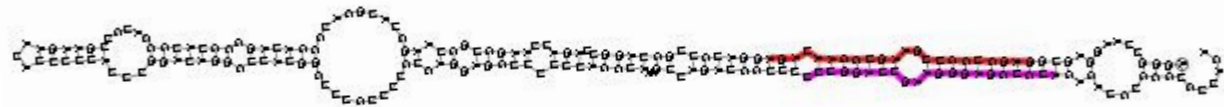

# Jcu MIR1463

|                  |        |                                                                                      |
|------------------|--------|--------------------------------------------------------------------------------------|
| 1 Jcu_miR1463    | 100.0% | AAAAGTTCTGGATGTCCTTGTTTGGGTGTTTATTGTTACTTGTTATATCAAAATCTTCTATGATGGATTTCTGAGAACTTTATT |
| 2 J25_57780_x8   | 100.0% | -----CTTCTATGATGGATTTCTGAGAACT-----                                                  |
| 3 J24_5360430_x1 | 100.0% | -----CTTCTATGATGGATTTCTGAGAAC-----                                                   |
| 4 J24_1865063_x3 | 100.0% | -----TTCTATGATGGATTTCTGAGAACT-----                                                   |
| 5 J23_619240_x2  | 100.0% | -----TTCTATGATGGATTTCTGAGAAC-----                                                    |

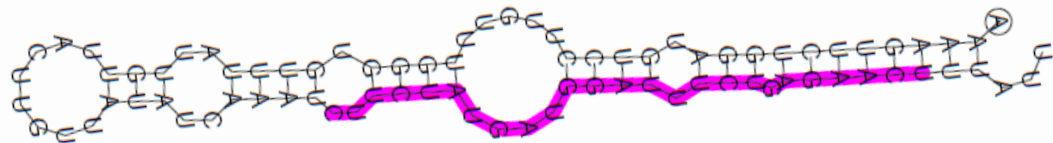

Jcu MIR166a

|    |                    |        |                                                                                                                                                                 |
|----|--------------------|--------|-----------------------------------------------------------------------------------------------------------------------------------------------------------------|
| 1  | Jcu_miRNA166a      | 100.0% | TTTCTCTTTTGAGGGGAATGTTGTCTGGCTCGAGGACTCTCTTTTGATCCATCTTTGTTGATGATTTTTCTTTAATTATATCCATAGATCTAATAGGTGATGGATTTAGAATTAGATTGATCATGTGATAGTGTGCTCGGACCAGGCTTCATTCCCC-- |
| 2  | J24_2094014_x3     | 100.0% | -----TTTGAGGGGAATGTTGTCTGGCTC-----                                                                                                                              |
| 3  | J21_2038316_x12    | 100.0% | -----TTTGAGGGGAATGTTGTCTGG-----                                                                                                                                 |
| 4  | J21_2283867_x1     | 100.0% | -----TTGAGGGGAATGTTGTCTGGC-----                                                                                                                                 |
| 5  | J21_2574016_x1     | 100.0% | -----GAGGGGAATGTTGTCTGGCTC-----                                                                                                                                 |
| 6  | J20_253565_x1      | 100.0% | -----GGGGAATGTTGTCTGGCTCG-----                                                                                                                                  |
| 7  | J21_2308024_x1     | 100.0% | -----GGGGAATGTTGTCTGGCTCGA-----                                                                                                                                 |
| 8  | J19_182163_x4      | 100.0% | -----GGAATGTTGTCTGGCTCGA-----                                                                                                                                   |
| 9  | J20_210506_x9      | 100.0% | -----GGAATGTTGTCTGGCTCGAG-----                                                                                                                                  |
| 10 | J21_1384537_x2286  | 100.0% | -----GGAATGTTGTCTGGCTCGAGG-----                                                                                                                                 |
| 11 | J22_1660145_x21    | 100.0% | -----GGAATGTTGTCTGGCTCGAGGA-----                                                                                                                                |
| 12 | J23_1151125_x1     | 100.0% | -----GGAATGTTGTCTGGCTCGAGGAC-----                                                                                                                               |
| 13 | J24_2099921_x3     | 100.0% | -----GGAATGTTGTCTGGCTCGAGGACT-----                                                                                                                              |
| 14 | J22_1952194_x1     | 100.0% | -----GAATGTTGTCTGGCTCGAGGAC-----                                                                                                                                |
| 15 | J21_1994650_x19    | 100.0% | -----GAATGTTGTCTGGCTCGAGGA-----                                                                                                                                 |
| 16 | J20_214516_x6      | 100.0% | -----GAATGTTGTCTGGCTCGAGG-----                                                                                                                                  |
| 17 | J21_1851315_x86    | 100.0% | -----                                                                                                                                                           |
| 18 | J22_1804949_x4     | 100.0% | -----GTGGACCAGGCTTCATTCCC-----                                                                                                                                  |
| 19 | J21_554760_x105664 | 100.0% | -----GTGGACCAGGCTTCATTCCC-----                                                                                                                                  |
| 20 | J22_1531901_x68    | 95.5%  | -----TCGGACCAGGCTTCATTCCCC-----                                                                                                                                 |
| 21 | J23_756083_x1      | 91.3%  | -----TCGGACCAGGCTTCATTCCCCC-----                                                                                                                                |
| 22 | J21_2370376_x1     | 95.2%  | -----CGGACCAGGCTTCATTCCCC-----                                                                                                                                  |
| 23 | J20_105367_x3808   | 100.0% | -----TCGGACCAGGCTTCATTCCC-----                                                                                                                                  |
| 24 | J20_153381_x305    | 100.0% | -----CGGACCAGGCTTCATTCCCC-----                                                                                                                                  |
| 25 | J19_155651_x114    | 100.0% | -----GGACCAGGCTTCATTCCCC-----                                                                                                                                   |
| 26 | J19_173882_x14     | 100.0% | -----CGGACCAGGCTTCATTCCC-----                                                                                                                                   |
| 27 | J19_151294_x161    | 100.0% | -----TCGGACCAGGCTTCATTCC-----                                                                                                                                   |
| 28 | J18_131802_x29     | 100.0% | -----TCGGACCAGGCTTCATTTC-----                                                                                                                                   |
| 29 | J18_141626_x5      | 100.0% | -----GGACCAGGCTTCATTCCC-----                                                                                                                                    |
| 30 | J18_218824_x1      | 100.0% | -----CGGACCAGGCTTCATTCC-----                                                                                                                                    |
| 31 | J18_150685_x2      | 100.0% | -----GACCAGGCTTCATTCCCC-----                                                                                                                                    |

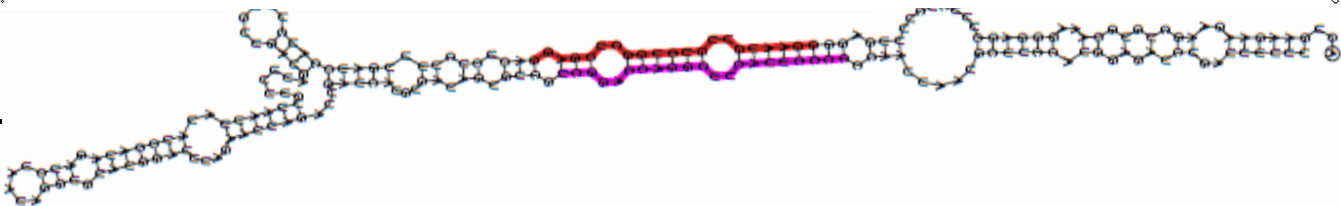

Jcu MIR166b

|    |                   |        |                                                                                           |
|----|-------------------|--------|-------------------------------------------------------------------------------------------|
| 1  | Jcu_miR166b       | 100.0% | AGAAAGCTGTATATCTTTTGAGGGGAATGTTGTCTGGCTCGAGGCCACTAACTAGATCTACAAGTTTATCTCAATTGATTTTCTTTTCA |
| 2  | J24_2094014_x3    | 100.0% | -----TTTGAGGGGAATGTTGTCTGGCTC-----                                                        |
| 3  | J21_2038316_x12   | 100.0% | -----TTTGAGGGGAATGTTGTCTGG-----                                                           |
| 4  | J21_2283867_x1    | 100.0% | -----TTGAGGGGAATGTTGTCTGGC-----                                                           |
| 5  | J21_2574016_x1    | 100.0% | -----GAGGGGAATGTTGTCTGGCTC-----                                                           |
| 6  | J20_253565_x1     | 100.0% | -----GGGGAATGTTGTCTGGCTCG-----                                                            |
| 7  | J21_2308024_x1    | 100.0% | -----GGGGAATGTTGTCTGGCTCGA-----                                                           |
| 8  | J19_182163_x4     | 100.0% | -----GGAATGTTGTCTGGCTCGA-----                                                             |
| 9  | J20_210506_x9     | 100.0% | -----GGAATGTTGTCTGGCTCGAG-----                                                            |
| 10 | J21_1384537_x2286 | 100.0% | -----GGAATGTTGTCTGGCTCGAGG-----                                                           |
| 11 | J22_1785069_x5    | 100.0% | -----GGAATGTTGTCTGGCTCGAGGC-----                                                          |
| 12 | J21_2171646_x3    | 100.0% | -----GAATGTTGTCTGGCTCGAGGC-----                                                           |
| 13 | J22_1911659_x1    | 100.0% | -----GAATGTTGTCTGGCTCGAGGCC-----                                                          |
| 14 | J20_214516_x6     | 100.0% | -----GAATGTTGTCTGGCTCGAGG-----                                                            |
| 15 | J21_2648432_x1    | 100.0% | -----ATGTTGTCTGGCTCGAGGCCA-----                                                           |

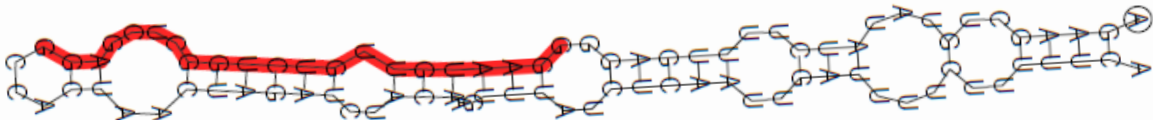

Jcu MIR167a

|    |                   |        |                                                                                                                    |
|----|-------------------|--------|--------------------------------------------------------------------------------------------------------------------|
| 1  | Jcu_miRNA167a     | 100.0% | ACCTCTAGTAGTTGAAGCTGCCAGCATGATCTGAGCTTTCCTTAATACTCATCGATCCTACCCTATCCAGAGAGGAGGGATTAGATCATGTGGCAGTTTCACCTGTTAATGGTA |
| 2  | J25_261788_x1     | 100.0% | -----TGAAGCTGCCAGCATGATCTGAGCT-----                                                                                |
| 3  | J24_4921698_x1    | 100.0% | -----TGAAGCTGCCAGCATGATCTGAGC-----                                                                                 |
| 4  | J23_427162_x6     | 100.0% | -----TTGAAGCTGCCAGCATGATCTGA-----                                                                                  |
| 5  | J23_326151_x128   | 100.0% | -----TGAAGCTGCCAGCATGATCTGAG-----                                                                                  |
| 6  | J22_1809197_x4    | 100.0% | -----TTGAAGCTGCCAGCATGATCTG-----                                                                                   |
| 7  | J22_1863832_x2    | 100.0% | -----AAGCTGCCAGCATGATCTGAGC-----                                                                                   |
| 8  | J22_0_x829649     | 100.0% | -----TGAAGCTGCCAGCATGATCTGA-----                                                                                   |
| 9  | J22_1797004_x5    | 100.0% | -----GTTGAAGCTGCCAGCATGATCT-----                                                                                   |
| 10 | J21_1484832_x1335 | 100.0% | -----GAAGCTGCCAGCATGATCTGA-----                                                                                    |
| 11 | J21_961495_x18100 | 100.0% | -----TGAAGCTGCCAGCATGATCTG-----                                                                                    |
| 12 | J21_2263849_x2    | 100.0% | -----GTTGAAGCTGCCAGCATGATC-----                                                                                    |
| 13 | J20_192364_x36    | 100.0% | -----AAGCTGCCAGCATGATCTGA-----                                                                                     |
| 14 | J20_171675_x127   | 100.0% | -----TGAAGCTGCCAGCATGATCT-----                                                                                     |
| 15 | J20_219243_x5     | 100.0% | -----GAAGCTGCCAGCATGATCTG-----                                                                                     |
| 16 | J19_151129_x165   | 100.0% | -----AGCTGCCAGCATGATCTGA-----                                                                                      |
| 17 | J19_163275_x50    | 100.0% | -----TGAAGCTGCCAGCATGATC-----                                                                                      |
| 18 | J18_117586_x196   | 100.0% | -----TGAAGCTGCCAGCATGAT-----                                                                                       |
| 19 | J18_121420_x134   | 100.0% | -----GCTGCCAGCATGATCTGA-----                                                                                       |
| 20 | J21_2052311_x10   | 100.0% | -----TTAGATCATGTGGCAGTTTCA-----                                                                                    |
| 21 | J24_4106312_x1    | 100.0% | -----TTAGATCATGTGGCAGTTTCACCT-----                                                                                 |
| 22 | J22_1859016_x2    | 100.0% | -----AGATCATGTGGCAGTTTCACCT-----                                                                                   |
| 23 | J21_1821946_x110  | 100.0% | -----AGATCATGTGGCAGTTTCACC-----                                                                                    |
| 24 | J21_2147751_x3    | 100.0% | -----GATCATGTGGCAGTTTCACCT-----                                                                                    |
| 25 | J20_223905_x3     | 100.0% | -----ATCATGTGGCAGTTTCACCT-----                                                                                     |
| 26 | J20_193415_x33    | 100.0% | -----GATCATGTGGCAGTTTCACC-----                                                                                     |
| 27 | J20_229476_x2     | 100.0% | -----AGATCATGTGGCAGTTTCAC-----                                                                                     |
| 28 | J21_2094654_x6    | 100.0% | -----ATCATGTGGCAGTTTCACCTG-----                                                                                    |
| 29 | J19_190904_x2     | 100.0% | -----TCATGTGGCAGTTTCACCT-----                                                                                      |

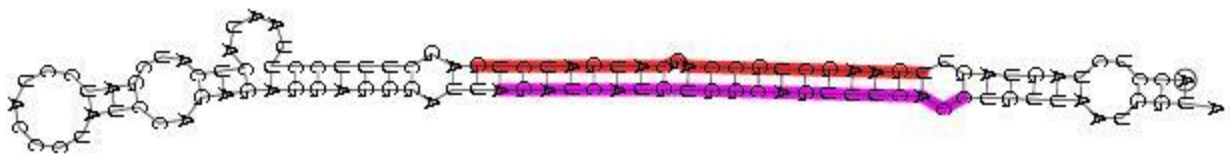



# Jcu MIR167b

|    |                   |        |                                                                                                             |
|----|-------------------|--------|-------------------------------------------------------------------------------------------------------------|
| 1  | Jcu_miRNA167b     | 100.0% | GTTGAAGCTGCCAGCATGATCTAATCTTCCTTTCTCCTCCTCCGTCGTCGTCGGAAGGCCAAGATCAGATCATGTGGTAGCTTCACCTGTTGATGGCTTCACGGCAA |
| 2  | J24_4395384_x1    | 100.0% | -----TCAGATCATGTGGTAGCTTCACCT-----                                                                          |
| 3  | J21_1723896_x252  | 100.0% | -----TCAGATCATGTGGTAGCTTCA-----                                                                             |
| 4  | J20_226062_x3     | 100.0% | -----TCAGATCATGTGGTAGCTTC-----                                                                              |
| 5  | J21_2522965_x1    | 100.0% | -----AGATCATGTGGTAGCTTCACC-----                                                                             |
| 6  | J21_2564152_x1    | 100.0% | -----AAGATCAGATCATGTGGTAGC-----                                                                             |
| 7  | J21_2099934_x6    | 100.0% | -----AGATCAGATCATGTGGTAGCT-----                                                                             |
| 8  | J20_281001_x1     | 100.0% | -----GATCAGATCATGTGGTAGCT-----                                                                              |
| 9  | J22_1837700_x3    | 100.0% | -----ATGTGGTAGCTTCACCTGTTGA-----                                                                            |
| 10 | J21_2222627_x2    | 100.0% | -----TGTGGTAGCTTCACCTGTTGA-----                                                                             |
| 11 | J21_2263849_x2    | 100.0% | GTTGAAGCTGCCAGCATGATC-----                                                                                  |
| 12 | J22_1797004_x5    | 100.0% | GTTGAAGCTGCCAGCATGATCT-----                                                                                 |
| 13 | J21_1271883_x3706 | 100.0% | --TGAAGCTGCCAGCATGATCTA-----                                                                                |
| 14 | J22_1246151_x2517 | 100.0% | --TGAAGCTGCCAGCATGATCTAA-----                                                                               |
| 15 | J23_353628_x32    | 100.0% | --TGAAGCTGCCAGCATGATCTAAT-----                                                                              |
| 16 | J24_3421511_x1    | 100.0% | --TGAAGCTGCCAGCATGATCTAATC-----                                                                             |
| 17 | J22_1878184_x2    | 100.0% | ---GAAGCTGCCAGCATGATCTAAT-----                                                                              |
| 18 | J21_2056529_x9    | 100.0% | ---GAAGCTGCCAGCATGATCTAA-----                                                                               |
| 19 | J22_2090397_x1    | 100.0% | ----AAGCTGCCAGCATGATCTAATC-----                                                                             |
| 20 | J20_171675_x127   | 100.0% | --TGAAGCTGCCAGCATGATCT-----                                                                                 |
| 21 | J19_257411_x1     | 100.0% | ----AGCTGCCAGCATGATCTAA-----                                                                                |
| 22 | J19_163275_x50    | 100.0% | --TGAAGCTGCCAGCATGATC-----                                                                                  |
| 23 | J18_117586_x196   | 100.0% | --TGAAGCTGCCAGCATGAT-----                                                                                   |
| 24 | J18_143816_x3     | 100.0% | ----AGCTGCCAGCATGATCTA-----                                                                                 |

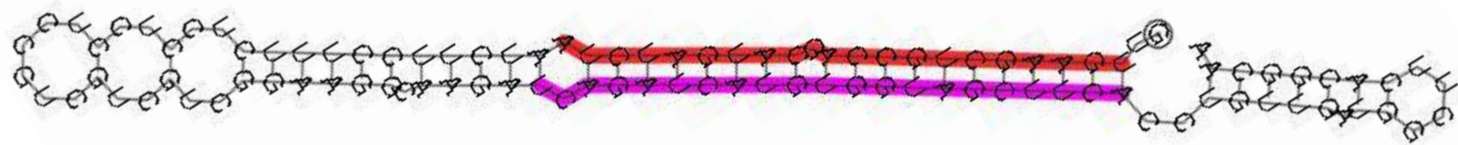

# Jcu MIR168

|    |                   |        |                                                                                                                                                                                              |
|----|-------------------|--------|----------------------------------------------------------------------------------------------------------------------------------------------------------------------------------------------|
| 1  | Jcu_miRNA168      | 100.0% | AGTTGATTCTGTTACCGGGCGTCTCTAAATTCGCTTGGTGCAAGGTGGGGAACTGATTGGCTTCGGTTGTATGTACTTGTGTGTACAGTATGTACTTAATCAATGCCAGATGGCGAGATGTGATTAGTGAATGGAAGCGGAATTGGATCCCGCCTTGCATCAACTGAATGGAGACCGCGGTGAAGGGT |
| 2  | J24_2518093_x2    | 100.0% | -----GATCCGCGCTTGCATCAACTGAAT-----                                                                                                                                                           |
| 3  | J21_2273095_x1    | 100.0% | -----TCGCGCCTTGCATCAACTGAA-----                                                                                                                                                              |
| 4  | J21_1881254_x64   | 100.0% | -----CCGCGCCTTGCATCAACTGAAT-----                                                                                                                                                             |
| 5  | J20_198378_x23    | 100.0% | -----CCGCGCCTTGCATCAACTGAA-----                                                                                                                                                              |
| 6  | J20_252538_x1     | 100.0% | -----CGCGCCTTGCATCAACTGAAT-----                                                                                                                                                              |
| 7  | J22_1772125_x6    | 100.0% | -----CGCCTTGCATCAACTGAATCGG-----                                                                                                                                                             |
| 8  | J21_2236375_x2    | 100.0% | -----GCCTTGCATCAACTGAATCGG-----                                                                                                                                                              |
| 9  | J19_177774_x8     | 100.0% | -----CCGCGCCTTGCATCAACTGA-----                                                                                                                                                               |
| 10 | J21_2128831_x4    | 100.0% | -----CTTGCATCAACTGAATCGGAG-----                                                                                                                                                              |
| 11 | J22_1608235_x35   | 100.0% | -----CCTTGCATCAACTGAATCGGAG-----                                                                                                                                                             |
| 12 | J23_601964_x2     | 100.0% | -----CCTTGCATCAACTGAATCGGAGA-----                                                                                                                                                            |
| 13 | J24_4047663_x1    | 100.0% | -----CCTTGCATCAACTGAATCGGAGAC-----                                                                                                                                                           |
| 14 | J21_2153736_x3    | 100.0% | -----CCTTGCATCAACTGAATCGGA-----                                                                                                                                                              |
| 15 | J21_1742316_x217  | 100.0% | -----TTGCATCAACTGAATCGGAGA-----                                                                                                                                                              |
| 16 | J22_1758462_x7    | 100.0% | -----TTGCATCAACTGAATCGGAGAC-----                                                                                                                                                             |
| 17 | J20_297874_x1     | 100.0% | -----TTGCATCAACTGAATCGGAG-----                                                                                                                                                               |
| 18 | J21_2075143_x8    | 100.0% | -----TGCATCAACTGAATCGGAGAC-----                                                                                                                                                              |
| 19 | J20_306027_x1     | 100.0% | -----TGCATCAACTGAATCGGAGA-----                                                                                                                                                               |
| 20 | J18_194121_x1     | 100.0% | -----TTGCATCAACTGAATCGG-----                                                                                                                                                                 |
| 21 | J19_187458_x2     | 100.0% | -----TTGCATCAACTGAATCGGA-----                                                                                                                                                                |
| 22 | J20_232000_x2     | 100.0% | -----GCATCAACTGAATCGGAGAC-----                                                                                                                                                               |
| 23 | J21_1993368_x20   | 100.0% | -----GCATCAACTGAATCGGAGACC-----                                                                                                                                                              |
| 24 | J20_237598_x2     | 100.0% | -----CATCAACTGAATCGGAGACC-----                                                                                                                                                               |
| 28 | J18_144323_x3     | 100.0% | -----TCTCTAATTCGCTTGGTG-----                                                                                                                                                                 |
| 29 | J19_286613_x1     | 100.0% | -----TCTCTAATTCGCTTGGTGC-----                                                                                                                                                                |
| 30 | J20_217608_x5     | 100.0% | -----TCTCTAATTCGCTTGGTGCA-----                                                                                                                                                               |
| 31 | J21_1626098_x570  | 100.0% | -----TCTCTAATTCGCTTGGTGCGAG-----                                                                                                                                                             |
| 32 | J22_1696554_x15   | 100.0% | -----TCTCTAATTCGCTTGGTGCAAG-----                                                                                                                                                             |
| 33 | J23_943224_x1     | 100.0% | -----TCTCTAATTCGCTTGGTGCAAGT-----                                                                                                                                                            |
| 34 | J22_1815633_x4    | 100.0% | -----CTCTAATTCGCTTGGTGCAAGT-----                                                                                                                                                             |
| 35 | J21_2018960_x15   | 100.0% | -----CTCTAATTCGCTTGGTGCAAG-----                                                                                                                                                              |
| 36 | J21_2123431_x4    | 100.0% | -----TCTAATTCGCTTGGTGCAAGT-----                                                                                                                                                              |
| 37 | J20_303861_x1     | 100.0% | -----CTCTAATTCGCTTGGTGCGAG-----                                                                                                                                                              |
| 38 | J20_239870_x2     | 100.0% | -----TCTAATTCGCTTGGTGCGAG-----                                                                                                                                                               |
| 39 | J19_185138_x3     | 100.0% | -----TCTAATTCGCTTGGTGCGAG-----                                                                                                                                                               |
| 40 | J18_226664_x1     | 100.0% | -----TCTAATTCGCTTGGTGCA-----                                                                                                                                                                 |
| 41 | J21_1948874_x32   | 100.0% | -----AATTCGCTTGGTGCAAGTTCGG-----                                                                                                                                                             |
| 42 | J22_1724468_x11   | 100.0% | -----AATTCGCTTGGTGCAAGTTCGGG-----                                                                                                                                                            |
| 43 | J24_1678432_x4    | 100.0% | -----AATTCGCTTGGTGCAAGTTCGGGAA-----                                                                                                                                                          |
| 44 | J21_2691109_x1    | 100.0% | -----ATTTCGCTTGGTGCAAGTTCGGG-----                                                                                                                                                            |
| 45 | J21_2685255_x1    | 100.0% | -----TTTCGCTTGGTGCAAGTTCGGGA-----                                                                                                                                                            |
| 46 | J20_156306_x272   | 100.0% | -----TCGCTTGGTGCAAGTTCGGGA-----                                                                                                                                                              |
| 47 | J21_941900_x19595 | 100.0% | -----TCGCTTGGTGCAAGTTCGGGAA-----                                                                                                                                                             |
| 48 | J22_1536247_x65   | 100.0% | -----TCGCTTGGTGCAAGTTCGGGAAC-----                                                                                                                                                            |
| 49 | J24_1715272_x4    | 100.0% | -----TCGCTTGGTGCAAGTTCGGGAACGT-----                                                                                                                                                          |
| 50 | J21_1962816_x28   | 100.0% | -----CGCTTGGTGCAAGTTCGGGAAC-----                                                                                                                                                             |
| 51 | J20_194726_x31    | 100.0% | -----CGCTTGGTGCAAGTTCGGGAA-----                                                                                                                                                              |
| 52 | J19_175640_x11    | 100.0% | -----TCGCTTGGTGCAAGTTCGGG-----                                                                                                                                                               |
| 53 | J18_195618_x1     | 100.0% | -----GCTTGGTGCAAGTTCGGGA-----                                                                                                                                                                |
| 54 | J19_170889_x21    | 100.0% | -----GCTTGGTGCAAGTTCGGGAA-----                                                                                                                                                               |
| 55 | J18_144971_x3     | 100.0% | -----TCGCTTGGTGCAAGTTCGG-----                                                                                                                                                                |
| 56 | J18_142785_x4     | 100.0% | -----CTTGGTGCAAGTTCGGGAA-----                                                                                                                                                                |
| 57 | J21_2356363_x1    | 100.0% | -----AGGTTCGGGAACGTGATTGGCTT-----                                                                                                                                                            |
| 58 | J21_2386272_x1    | 100.0% | -----GGTTCGGGAACGTGATTGGCTTC-----                                                                                                                                                            |
| 59 | J21_2608619_x1    | 100.0% | -----CGGGAACGTGATTGGCTTCGCT-----                                                                                                                                                             |
| 60 | J22_1873372_x2    | 100.0% | -----CGGGAACGTGATTGGCTTCGCTT-----                                                                                                                                                            |
| 61 | J21_2119296_x5    | 100.0% | -----CTTGGTGCAAGTTCGGGAACGT-----                                                                                                                                                             |
| 62 | J21_2292636_x1    | 100.0% | -----TTGGTGCAAGTTCGGGAACGTGA-----                                                                                                                                                            |
| 63 | J21_2003559_x17   | 100.0% | -----TGGTGCAAGTTCGGGAACGTGAT-----                                                                                                                                                            |
| 64 | J22_2084690_x1    | 100.0% | -----TGGTGCAAGTTCGGGAACGTGATT-----                                                                                                                                                           |
| 65 | J24_2958651_x2    | 100.0% | -----TGGTGCAAGTTCGGGAACGTGATTGG-----                                                                                                                                                         |
| 66 | J23_587190_x2     | 100.0% | -----GGTGCAAGTTCGGGAACGTGATTGG-----                                                                                                                                                          |
| 67 | J20_248751_x1     | 100.0% | -----GGTGCAAGTTCGGGAACGTGAT-----                                                                                                                                                             |
| 68 | J20_215050_x6     | 100.0% | -----TGGTGCAAGTTCGGGAACGTGA-----                                                                                                                                                             |
| 69 | J18_178071_x1     | 100.0% | -----TGCAGGTTCGGGAACGTGAT-----                                                                                                                                                               |

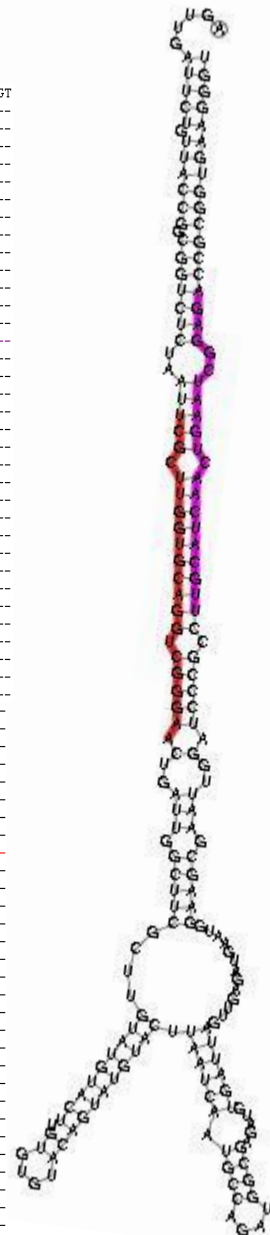



Jcu MIR169a

|    |                   |        |          |                      |                                    |                                                                                |
|----|-------------------|--------|----------|----------------------|------------------------------------|--------------------------------------------------------------------------------|
| 1  | Jcu_miRNA169      | 100.0% | GCCTTGCA | TGAAGAGGTAGAGAGTGTAA | TCAGCCAAGGATGACTTGCCGGCCTGGCCTTGCC | TGCAGCTATCTACAACACCCGCCAACGCCGGCAAGTTGTTTCTTTGGCTACATTGTACTCTTTTCTTCTCATGTCAGG |
| 2  | J23_392903_x11    | 100.0% | -----    | -----                | -----                              | CGGCAAGTTGTTTCTTTGGGTAC-----                                                   |
| 3  | J23_425358_x7     | 100.0% | -----    | -----                | -----                              | GGCAAGTTGTTTCTTTGGGTACA-----                                                   |
| 4  | J22_2125299_x1    | 100.0% | -----    | -----                | -----                              | CGGCAAGTTGTTTCTTTGGGTA-----                                                    |
| 5  | J22_1660964_x21   | 100.0% | -----    | -----                | -----                              | GCAAGTTGTTTCTTTGGGTACA-----                                                    |
| 6  | J22_1643705_x25   | 100.0% | -----    | -----                | -----                              | GGCAAGTTGTTTCTTTGGGTAC-----                                                    |
| 7  | J21_1989988_x20   | 100.0% | -----    | -----                | -----                              | GCAAGTTGTTTCTTTGGGTAC-----                                                     |
| 8  | J21_1947818_x32   | 100.0% | -----    | -----                | -----                              | GGCAAGTTGTTTCTTTGGGTA-----                                                     |
| 9  | J20_216214_x6     | 100.0% | -----    | -----                | -----                              | GCAAGTTGTTTCTTTGGGTA-----                                                      |
| 10 | J20_212314_x8     | 100.0% | -----    | -----                | -----                              | GGCAAGTTGTTTCTTTGGGT-----                                                      |
| 11 | J19_273146_x1     | 100.0% | -----    | -----                | -----                              | GCAAGTTGTTTCTTTGGGT-----                                                       |
| 12 | J19_197298_x1     | 100.0% | -----    | -----                | -----                              | GGCAAGTTGTTTCTTTGGC-----                                                       |
| 13 | J18_206927_x1     | 100.0% | -----    | -----                | -----                              | GCAAGTTGTTTCTTTGGC-----                                                        |
| 15 | J18_148293_x2     | 100.0% | -----    | -----                | -----                              | -----                                                                          |
| 16 | J22_2110946_x1    | 100.0% | -----    | -----                | -----                              | -----                                                                          |
| 17 | J21_1251650_x4275 | 100.0% | -----    | -----                | -----                              | -----                                                                          |
| 18 | J22_1880218_x2    | 100.0% | -----    | -----                | -----                              | -----                                                                          |
| 19 | J20_145417_x443   | 100.0% | -----    | -----                | -----                              | -----                                                                          |
| 20 | J20_241978_x2     | 100.0% | -----    | -----                | -----                              | -----                                                                          |
| 21 | J21_1953742_x30   | 100.0% | -----    | -----                | -----                              | -----                                                                          |
| 22 | J19_191222_x2     | 100.0% | -----    | -----                | -----                              | -----                                                                          |

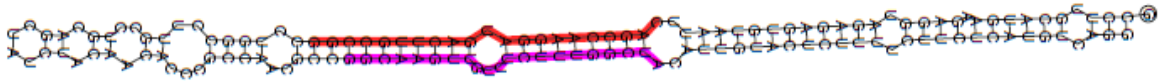

Jcu MIR390

|    |                  |        |                                                                                                                               |
|----|------------------|--------|-------------------------------------------------------------------------------------------------------------------------------|
| 1  | Jcu_mir390       | 100.0% | GTATGGAAGAATCTGTTAAGCTCAGGAGGGATAGCGCCATAATCGATCATTACTCTTTTTTCTTGGGGTTTTGATTTTCTTTCTATAGCGCTATCCATCCTGAGTTTCATGGCTTCTTCTTGCTG |
| 2  | J22_2076988_x1   | 100.0% | -----AAGCTCAGGAGGGATAGCGCCA-----                                                                                              |
| 3  | J21_1635946_x528 | 100.0% | -----AAGCTCAGGAGGGATAGCGCC-----                                                                                               |
| 4  | J21_2651976_x1   | 100.0% | -----AGCTCAGGAGGGATAGCGCCA-----                                                                                               |
| 5  | J20_200267_x20   | 100.0% | -----AAGCTCAGGAGGGATAGCGC-----                                                                                                |
| 6  | J20_183883_x63   | 100.0% | -----AGCTCAGGAGGGATAGCGCC-----                                                                                                |
| 7  | J19_224379_x1    | 100.0% | -----AAGCTCAGGAGGGATAGCG-----                                                                                                 |
| 8  | J19_250125_x1    | 100.0% | -----AGCTCAGGAGGGATAGCGC-----                                                                                                 |
| 9  | J19_185798_x3    | 100.0% | -----GCTCAGGAGGGATAGCGCC-----                                                                                                 |
| 10 | J18_214754_x1    | 100.0% | -----AAGCTCAGGAGGGATAGC-----                                                                                                  |
| 11 | J18_223911_x1    | 100.0% | -----CTCAGGAGGGATAGCGCC-----                                                                                                  |
| 12 | J18_144518_x3    | 100.0% | -----CGCTATCCATCCTGAGTT-----                                                                                                  |
| 13 | J19_268572_x1    | 100.0% | -----CGCTATCCATCCTGAGTTT-----                                                                                                 |
| 14 | J20_185741_x56   | 100.0% | -----CGCTATCCATCCTGAGTTTC-----                                                                                                |
| 15 | J21_1844115_x92  | 100.0% | -----CGCTATCCATCCTGAGTTTCA-----                                                                                               |
| 16 | J19_275800_x1    | 100.0% | -----GCTATCCATCCTGAGTTTC-----                                                                                                 |

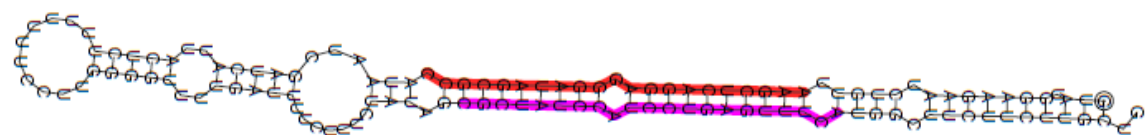

Jcu MIR320

|   |                 |        |                                                                                                     |
|---|-----------------|--------|-----------------------------------------------------------------------------------------------------|
| 1 | Jcu_mir320      | 100.0% | TTAAAAATTACCGAACCGGGACGTGAAAGGCTAACGGCGACGTTAGGGGGTCCGGGGACGGCGGGGGGACTCGGGAAGAGGTATCTTTTCTTTTGATAG |
| 2 | J21_1930029_x39 | 100.0% | -----CCGAACCGGGACGTGAAAGCT-----                                                                     |
| 3 | J20_198286_x23  | 100.0% | -----CCGAACCGGGACGTGAAAGGC-----                                                                     |
| 4 | J20_194937_x30  | 100.0% | -----CGAACCGGGACGTGAAAGGCT-----                                                                     |
| 5 | J19_180172_x6   | 100.0% | -----CCGAACCGGGACGTGAAAGG-----                                                                      |
| 6 | J19_179290_x6   | 100.0% | -----CGAACCGGGACGTGAAAGGC-----                                                                      |
| 7 | J18_144941_x3   | 100.0% | -----CCGAACCGGGACGTGAAAG-----                                                                       |
| 8 | J18_144887_x3   | 100.0% | -----CGAACCGGGACGTGAAAG-----                                                                        |

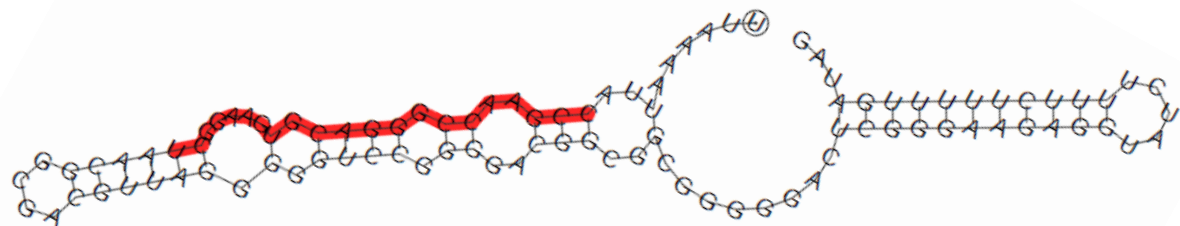

Jcu MIR403a

|    |                 |        |                                                                            |                                    |
|----|-----------------|--------|----------------------------------------------------------------------------|------------------------------------|
| 1  | Jcu_mir403a     | 100.0% | GGGACATATCTCTAGTTTGTGCGTGAATCGAACCCCATCTTGGCCGTTCAATTTTACGGCCCATCCAATGGTGT | TTAGATTCACGCATAAACTCGAAAATCT       |
| 2  | J24_4751762_x1  | 100.0% | -----                                                                      | -----TTAGATTCACGCATAAACTCGAAA----- |
| 3  | J23_807206_x1   | 100.0% | -----                                                                      | -----TTAGATTCACGCATAAACTCGAA-----  |
| 4  | J22_2016557_x1  | 100.0% | -----                                                                      | -----TTAGATTCACGCATAAACTCGA-----   |
| 5  | J21_1879371_x66 | 100.0% | -----                                                                      | -----TTAGATTCACGCATAAACTCG-----    |
| 6  | J21_2624191_x1  | 100.0% | -----                                                                      | -----TAGATTCACGCATAAACTCGA-----    |
| 7  | J20_214732_x6   | 100.0% | -----                                                                      | -----TTAGATTCACGCATAAACTC-----     |
| 8  | J20_247956_x1   | 100.0% | -----                                                                      | -----TAGATTCACGCATAAACTCG-----     |
| 9  | J19_170247_x23  | 100.0% | -----                                                                      | -----TTAGATTCACGCATAAACT-----      |
| 10 | J21_1906848_x49 | 100.0% | -----TCTAGTTTGTGCGTGAATCGA-----                                            | -----                              |
| 11 | J18_155840_x1   | 100.0% | -----AGTTTGTGCGTGAATCGA-----                                               | -----                              |
| 12 | J21_1999429_x18 | 100.0% | -----TAGTTTGTGCGTGAATCGAAC-----                                            | -----                              |
| 13 | J21_1907730_x49 | 100.0% | -----AGTTTGTGCGTGAATCGAACC-----                                            | -----                              |
| 14 | J24_3498824_x1  | 100.0% | -----AGTTTGTGCGTGAATCGAACCCCA-----                                         | -----                              |
| 15 | J20_327318_x1   | 100.0% | -----GTTTGTGCGTGAATCGAACC-----                                             | -----                              |
| 16 | J20_218398_x5   | 100.0% | -----AGTTTGTGCGTGAATCGAAC-----                                             | -----                              |
| 17 | J19_187850_x2   | 100.0% | -----AGTTTGTGCGTGAATCGAA-----                                              | -----                              |

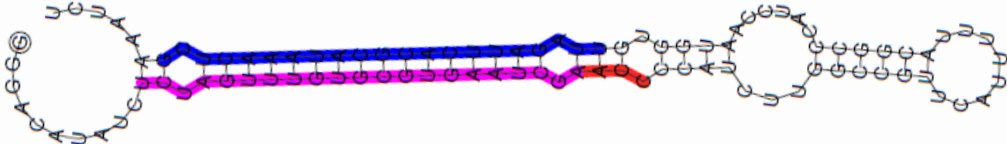

Jcu MIR403b

|   |                  |        |                                                                                                      |                                 |
|---|------------------|--------|------------------------------------------------------------------------------------------------------|---------------------------------|
| 1 | Jcu_mir403b      | 100.0% | GTGAATCTAATATATAAAAATTCGCCAATTTCTATCTATTGGATCGTGTAGATTCACGCACAAACCCGTAATCTGCCTTTTCAATTTTCTCGGTTTTTGC | TTAGATTCACGCACAAACCCG           |
| 2 | J21_2372462_x1   | 100.0% | -----TGTTAGATTCACGCACAAACC-----                                                                      | -----                           |
| 3 | J21_1783288_x157 | 100.0% | -----                                                                                                | -----TTAGATTCACGCACAAACCCG----- |
| 4 | J21_2657241_x1   | 100.0% | -----                                                                                                | -----TAGATTCACGCACAAACCCGT----- |
| 5 | J19_240308_x1    | 100.0% | -----                                                                                                | -----TTAGATTCACGCACAAACC-----   |
| 6 | J21_2687580_x1   | 100.0% | -----                                                                                                | -----AGATTCACGCACAAACCCGTA----- |
| 7 | J21_2100354_x6   | 100.0% | -----                                                                                                | -----ATTCACGCACAAACCCGTAAT----- |

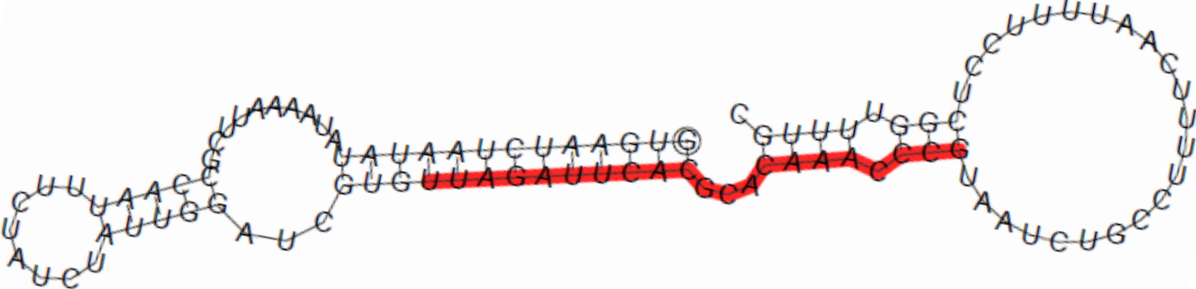

# Jcu MIR472

|    |                   |        |                                                                                                                    |
|----|-------------------|--------|--------------------------------------------------------------------------------------------------------------------|
| 1  | Jcu_miRNA472      | 100.0% | GAAGGTTCTGGGATGGGTGAGCGGGGAAGATAAAATTAATTATGTAAAAATTTAATTATTTTTTAATTGTTGTTGTTATTATCTTCCCTACTCCACCCATGCCATAGGTTTCCG |
| 2  | J24_2367131_x2    | 100.0% | -----CTTCCCTACTCCACCCATGCCATA-----                                                                                 |
| 3  | J23_434998_x6     | 100.0% | -----TCTTCCCTACTCCACCCATGCCA-----                                                                                  |
| 4  | J22_1276563_x1207 | 100.0% | -----TCTTCCCTACTCCACCCATGCC-----                                                                                   |
| 5  | J22_1862328_x2    | 100.0% | -----CTTCCCTACTCCACCCATGCCA-----                                                                                   |
| 6  | J23_334605_x71    | 100.0% | -----TTCCCTACTCCACCCATGCCATA-----                                                                                  |
| 7  | J21_1913014_x46   | 100.0% | -----TCTTCCCTACTCCACCCATGC-----                                                                                    |
| 8  | J21_2102214_x6    | 100.0% | -----CTTCCCTACTCCACCCATGCC-----                                                                                    |
| 9  | J22_1323922_x543  | 100.0% | -----TCCCTACTCCACCCATGCCATA-----                                                                                   |
| 10 | J21_2262285_x2    | 100.0% | -----TTCCCTACTCCACCCATGCCA-----                                                                                    |
| 11 | J21_2017235_x15   | 100.0% | -----TCCCTACTCCACCCATGCCAT-----                                                                                    |
| 12 | J20_358998_x1     | 100.0% | -----TCTTCCCTACTCCACCCATG-----                                                                                     |
| 13 | J20_230444_x2     | 100.0% | -----TCCCTACTCCACCCATGCCA-----                                                                                     |
| 14 | J20_214642_x6     | 100.0% | -----TTCCCTACTCCACCCATGCC-----                                                                                     |
| 15 | J19_222751_x1     | 100.0% | -----TCTTCCCTACTCCACCCAT-----                                                                                      |
| 16 | J19_234109_x1     | 100.0% | -----TCCCTACTCCACCCATGCC-----                                                                                      |
| 17 | J20_309410_x1     | 100.0% | -----CCTACTCCACCCATGCCATA-----                                                                                     |
| 18 | J19_204013_x1     | 100.0% | -----CTACTCCACCCATGCCATA-----                                                                                      |
| 19 | J18_205957_x1     | 100.0% | -----CCCTACTCCACCCATGCC-----                                                                                       |
| 20 | J18_224919_x1     | 100.0% | -----TCCCTACTCCACCCATGC-----                                                                                       |
| 21 | J19_203615_x1     | 100.0% | -----CTGGGATGGGTGAGCGGGG-----                                                                                      |
| 22 | J21_2135291_x4    | 100.0% | -----CTGGGATGGGTGAGCGGGGA-----                                                                                     |
| 23 | J20_144959_x458   | 100.0% | -----TGGGATGGGTGAGCGGGGA-----                                                                                      |
| 24 | J21_1300472_x3397 | 100.0% | -----TGGGATGGGTGAGCGGGGAAG-----                                                                                    |
| 25 | J22_1382389_x260  | 100.0% | -----TGGGATGGGTGAGCGGGGAAGA-----                                                                                   |
| 26 | J23_542936_x2     | 100.0% | -----TGGGATGGGTGAGCGGGGAAGAT-----                                                                                  |
| 27 | J21_2075015_x8    | 100.0% | -----GGGATGGGTGAGCGGGGAAGA-----                                                                                    |
| 28 | J20_198874_x22    | 100.0% | -----GGGATGGGTGAGCGGGGAAG-----                                                                                     |
| 29 | J19_160483_x68    | 100.0% | -----TGGGATGGGTGAGCGGGGA-----                                                                                      |
| 30 | J19_218246_x1     | 100.0% | -----GGGATGGGTGAGCGGGGA-----                                                                                       |
| 31 | J20_242210_x2     | 100.0% | -----GGATGGGTGAGCGGGGAAGA-----                                                                                     |
| 32 | J19_266223_x1     | 100.0% | -----GATGGGTGAGCGGGGAAGA-----                                                                                      |
| 33 | J21_2022247_x14   | 100.0% | -----GATGGGTGAGCGGGGAAGATA-----                                                                                    |
| 34 | J18_224821_x1     | 100.0% | -----GGGATGGGTGAGCGGGGA-----                                                                                       |
| 35 | J18_138345_x9     | 100.0% | -----TGGGATGGGTGAGCGGGG-----                                                                                       |
| 36 | J18_153102_x1     | 100.0% | -----ATGGGTGAGCGGGGAAGA-----                                                                                       |

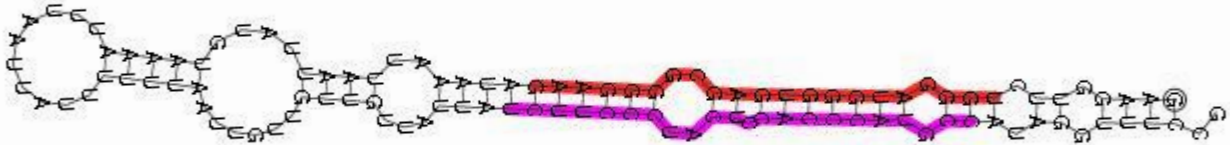

Jcu MIR482

|    |                   |        |                                                                                                            |
|----|-------------------|--------|------------------------------------------------------------------------------------------------------------|
| 1  | Jcu_miRNA482      | 100.0% | ATAGAATTTCATTGGAAGCTTTTGGCATGGGCGATATGGGCAAGATGAAAAATCTCTGTGAATCATCTTACCCACACCCCCCATACCGATGGTTTTCAATAATTCA |
| 2  | J24_640006_x13    | 100.0% | -----TCTTACCCACACCCCCCATACCGA-----                                                                         |
| 3  | J23_994672_x1     | 100.0% | -----CTTACCCACACCCCCCATACCGA-----                                                                          |
| 4  | J23_583330_x2     | 100.0% | -----TTACCCACACCCCCCATACCGAT-----                                                                          |
| 5  | J22_1910076_x1    | 100.0% | -----TCTTACCCACACCCCCCATACC-----                                                                           |
| 6  | J22_1257953_x1635 | 100.0% | -----TTACCCACACCCCCCATACCGA-----                                                                           |
| 7  | J21_2519832_x1    | 100.0% | -----TCTTACCCACACCCCCCATAC-----                                                                            |
| 8  | J21_1733438_x237  | 100.0% | -----TACCCACACCCCCCATACCGA-----                                                                            |
| 9  | J21_2427790_x1    | 100.0% | -----TTACCCACACCCCCCATACCG-----                                                                            |
| 10 | J20_296679_x1     | 100.0% | -----ACCCACACCCCCCATACCGA-----                                                                             |
| 11 | J20_222539_x4     | 100.0% | -----TTACCCACACCCCCCATACC-----                                                                             |
| 12 | J19_269574_x1     | 100.0% | -----TTACCCACACCCCCCATAC-----                                                                              |
| 13 | J18_150285_x2     | 100.0% | -----TTACCCACACCCCCCATA-----                                                                               |
| 14 | J18_169283_x1     | 100.0% | -----CCACACCCCCCATACCGA-----                                                                               |
| 18 | J18_160042_x1     | 100.0% | -----GGCATGGGCGATATGGGC-----                                                                               |
| 19 | J19_184544_x3     | 100.0% | -----GGCATGGGCGATATGGGCA-----                                                                              |
| 20 | J21_2215795_x2    | 100.0% | -----GGCATGGGCGATATGGGCAAG-----                                                                            |
| 21 | J22_1580795_x44   | 100.0% | -----GGCATGGGCGATATGGGCAAGA-----                                                                           |
| 22 | J24_849914_x10    | 100.0% | -----GGCATGGGCGATATGGGCAAGATG-----                                                                         |
| 23 | J20_362336_x1     | 100.0% | -----TGGGCGATATGGGCAAGATG-----                                                                             |
| 24 | J21_2016920_x15   | 100.0% | -----TGGGCGATATGGGCAAGATGA-----                                                                            |

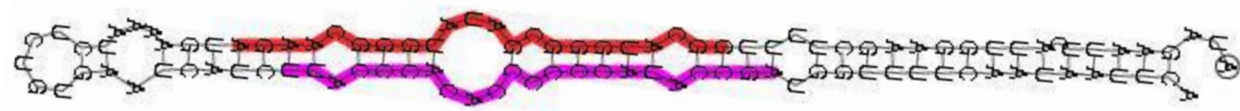

# Jcu MIR535a

|    |                  |        |                                                                                         |
|----|------------------|--------|-----------------------------------------------------------------------------------------|
| 1  | Jcu_mir535a      | 100.0% | GAGAAATGTGAAGTTCTCGTGCCATCCCCCTTCCCTTGTGTTGCCTTCAACTTTTGACATGATTGCTTGACGACGAGAGAGAGCACA |
| 2  | J24_3393844_x1   | 100.0% | -----ACGAGAGAGAGCACA                                                                    |
| 3  | J24_1125569_x7   | 100.0% | -----CGAGAGAGAGCACA                                                                     |
| 4  | J23_994616_x1    | 100.0% | -----CGAGAGAGAGCACA                                                                     |
| 5  | J22_1798553_x4   | 100.0% | -----AGAGAGAGCACA                                                                       |
| 6  | J21_2512988_x1   | 100.0% | -----AGAGAGAGCACA                                                                       |
| 7  | J22_2117245_x1   | 100.0% | -----ACGAGAGAGAGCACA                                                                    |
| 8  | J20_222235_x4    | 100.0% | -----ACGAGAGAGAGCACA                                                                    |
| 9  | J21_1991208_x20  | 100.0% | -----ACGAGAGAGAGCACA                                                                    |
| 10 | J21_2060390_x9   | 100.0% | -----CGACGAGAGAGCACA                                                                    |
| 11 | J22_1823450_x3   | 100.0% | -----CGACGAGAGAGCACA                                                                    |
| 12 | J21_2045407_x11  | 100.0% | -----TTGCTTGACGACGAGAGAGAG                                                              |
| 13 | J21_2684707_x1   | 100.0% | -----TGCTTGACGACGAGAGAGAGC                                                              |
| 14 | J19_172938_x16   | 100.0% | -----CTTGACGACGAGAGAGAGC                                                                |
| 15 | J20_190907_x40   | 100.0% | -----CTTGACGACGAGAGAGAGCA                                                               |
| 16 | J21_1730318_x242 | 100.0% | -----CTTGACGACGAGAGAGAGCAC                                                              |
| 17 | J22_2128802_x1   | 100.0% | -----CTTGACGACGAGAGAGAGCACA                                                             |
| 18 | J21_1698616_x326 | 100.0% | -----TTGACGACGAGAGAGAGCACA                                                              |
| 19 | J22_1831139_x3   | 100.0% | -----TTGACGACGAGAGAGAGCACA                                                              |
| 20 | J23_1009530_x1   | 100.0% | -----TTGACGACGAGAGAGAGCACA                                                              |
| 21 | J22_1560769_x53  | 100.0% | -----TGACGACGAGAGAGAGCACA                                                               |
| 22 | J21_1882790_x64  | 100.0% | -----TGACGACGAGAGAGAGCACA                                                               |
| 23 | J20_167862_x159  | 100.0% | -----TTGACGACGAGAGAGAGCACA                                                              |
| 24 | J20_207631_x11   | 100.0% | -----TGACGACGAGAGAGAGCACA                                                               |
| 25 | J19_182014_x5    | 100.0% | -----TGACGACGAGAGAGAGCACA                                                               |
| 26 | J19_178478_x7    | 100.0% | -----TTGACGACGAGAGAGAGCA                                                                |
| 27 | J18_134782_x16   | 100.0% | -----TGACGACGAGAGAGAGCA                                                                 |
| 28 | J18_130453_x35   | 100.0% | -----TTGACGACGAGAGAGAGC                                                                 |
| 29 | J18_145769_x3    | 100.0% | -----CTTGACGACGAGAGAGAG                                                                 |

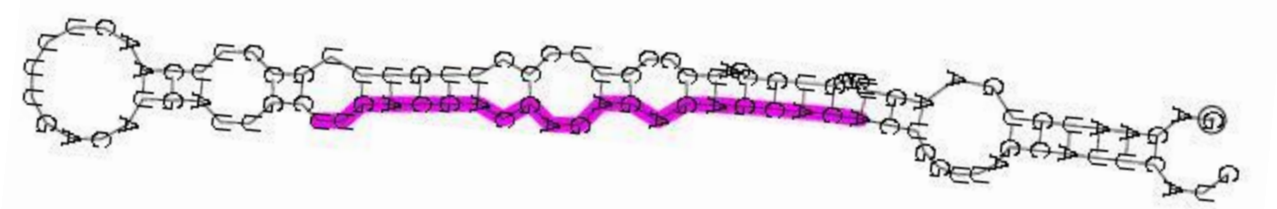



# Jcu MIR2022

|   |                 |        |                                                                                                                                                                                                     |
|---|-----------------|--------|-----------------------------------------------------------------------------------------------------------------------------------------------------------------------------------------------------|
| 1 | Jcu_mir2022     | 100.0% | TGTATAGGTGGCAAAAGCAATTAGTTAAAAGCAATTTTAATTTGATCCTTGAACCATCTTTTGTGGAATTTAATATTTGATACTGTGAATTGTTGCTGTCTAGAAATCGCTCAAACCGGATGGAATTGTTTCGATTTTCTCTAAATTATTCAATTAACTACTTGAAGTGTGCTTTTGGCCCCCTACACCATGTGG |
| 2 | J23_652814_x1   | 100.0% | -----TGAAGTGTGCTTTTGGCCCCCT-----                                                                                                                                                                    |
| 3 | J21_2534057_x1  | 100.0% | -----AACTAGTGTGCTTTTGGCCCCCT-----                                                                                                                                                                   |
| 4 | J21_2458317_x1  | 100.0% | -----TAGTTGCTTTTGGCCCCCTACA-----                                                                                                                                                                    |
| 5 | J21_2605918_x1  | 100.0% | --TATAGGTGGCAAAAGCAATTA--                                                                                                                                                                           |
| 6 | J21_1867235_x75 | 100.0% | ---ATAGGTGGCAAAAGCAATTAG---                                                                                                                                                                         |
| 7 | J18_223069_x1   | 100.0% | -----GCTGGCAAAAGCAATTAG-----                                                                                                                                                                        |

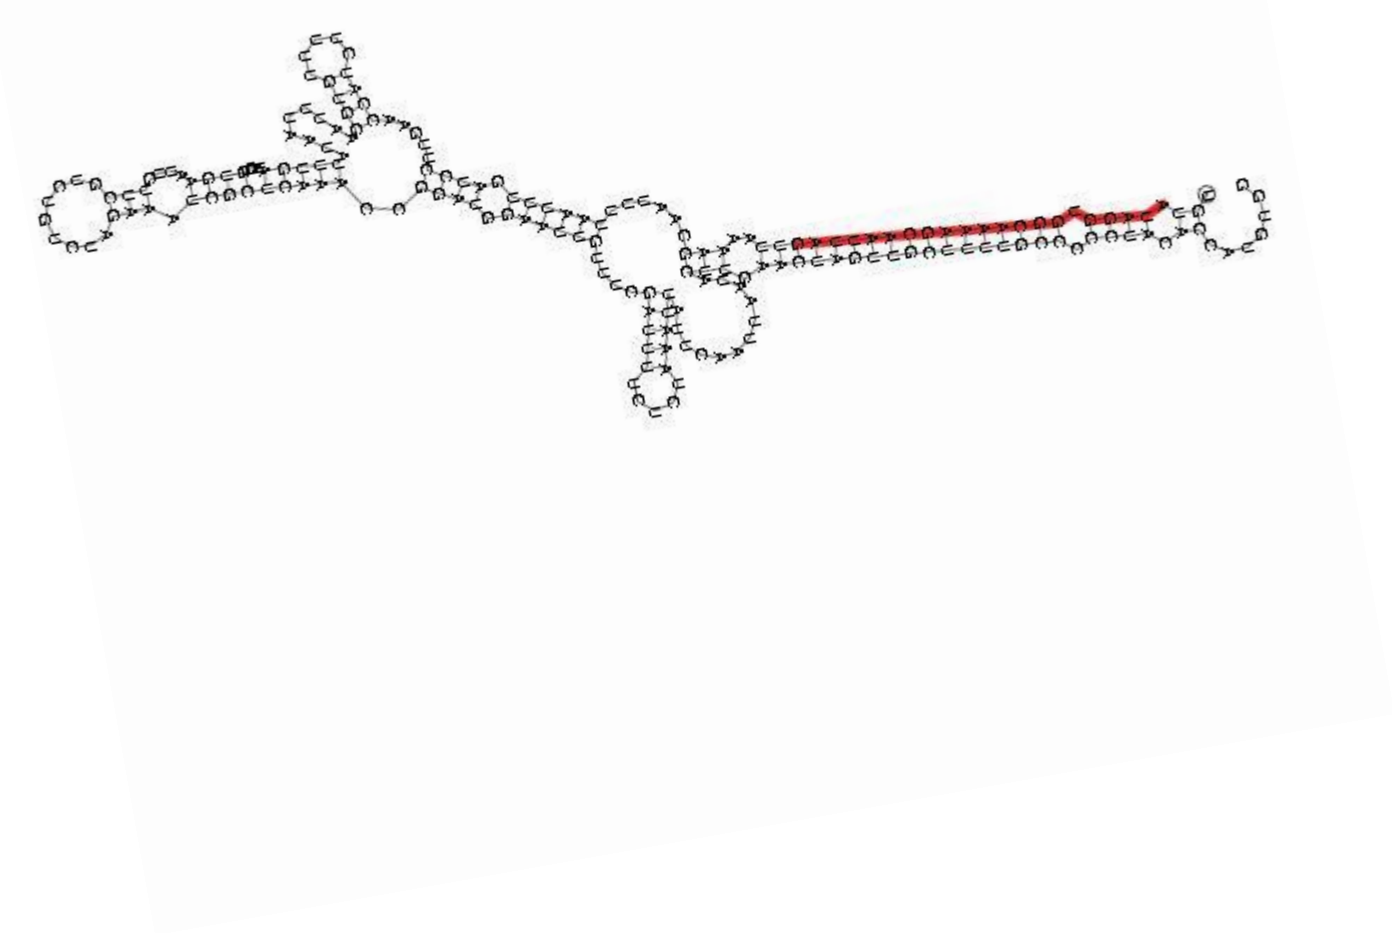

Jcu MIR2911

|    |                |        |                                                                                                      |
|----|----------------|--------|------------------------------------------------------------------------------------------------------|
| 1  | Jcu_miR2911a   | 100.0% | TCGGCGGACTGCTCGAGCTGCTCCCGCGGCGAGAGCGGGTCGCCGCGTGCCGGCCGGGGGGCGGACTGGGAACGGGCCTTCCGGGGGGCCTCCCCCGGCG |
| 2  | J25_105432_x2  | 100.0% | -----CGCCGCGTGCCCGGCCGGGGGGCGGA-----                                                                 |
| 3  | J23_618322_x2  | 100.0% | -----CCGCGTGCCCGGCCGGGGGGCGGA-----                                                                   |
| 4  | J24_4571697_x1 | 100.0% | -----CGCGTGCCCGGCCGGGGGGCGGACT-----                                                                  |
| 5  | J22_2075064_x1 | 100.0% | -----GCGTGCCCGGCCGGGGGGCGGAC-----                                                                    |
| 6  | J22_2144406_x1 | 100.0% | -----TCGCCGCGTGCCCGGCCGGGGGG-----                                                                    |
| 7  | J22_1824305_x3 | 100.0% | -----GCCGGCCGGGGGGCGGACTGGG-----                                                                     |
| 8  | J23_342137_x49 | 100.0% | -----GCCGGCCGGGGGGCGGACTGGGA-----                                                                    |
| 9  | J24_1380623_x5 | 100.0% | -----GCCGGCCGGGGGGCGGACTGGGAA-----                                                                   |
| 10 | J22_1868036_x2 | 100.0% | -----CCGGCCGGGGGGCGGACTGGGA-----                                                                     |
| 11 | J18_152301_x2  | 100.0% | -----TGCCGGCCGGGGGGCGGA-----                                                                         |
| 12 | J18_217876_x1  | 100.0% | -----CCGGGGGGCGGACTGGGA-----                                                                         |
| 13 | J18_180736_x1  | 100.0% | -----GGGGGCGGACTGGGAACG-----                                                                         |
| 14 | J24_4858065_x1 | 100.0% | -----GGACTGGGAACGGGCCTTCCGGGG-----                                                                   |

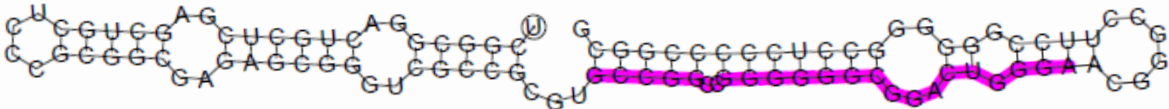

Jcu MIR2911

|    |                |        |                                                                                                      |
|----|----------------|--------|------------------------------------------------------------------------------------------------------|
| 1  | Jcu_miR2911a   | 100.0% | TCGGCGGACTGCTCGAGCTGCTCCCGCGGCGAGAGCGGGTCGCCGCGTGCCGGCCGGGGGGCGGACTGGGAACGGGCCTTCCGGGGGGCCTCCCCCGGCG |
| 2  | J25_105432_x2  | 100.0% | -----CGCCGCGTGCCCGGCCGGGGGGCGGA-----                                                                 |
| 3  | J23_618322_x2  | 100.0% | -----CCGCGTGCCCGGCCGGGGGGCGGA-----                                                                   |
| 4  | J24_4571697_x1 | 100.0% | -----CGCGTGCCCGGCCGGGGGGCGGACT-----                                                                  |
| 5  | J22_2075064_x1 | 100.0% | -----GCGTGCCCGGCCGGGGGGCGGAC-----                                                                    |
| 6  | J22_2144406_x1 | 100.0% | -----TCGCCGCGTGCCCGGCCGGGGGG-----                                                                    |
| 7  | J22_1824305_x3 | 100.0% | -----GCCGGCCGGGGGGCGGACTGGG-----                                                                     |
| 8  | J23_342137_x49 | 100.0% | -----GCCGGCCGGGGGGCGGACTGGGA-----                                                                    |
| 9  | J24_1380623_x5 | 100.0% | -----GCCGGCCGGGGGGCGGACTGGGAA-----                                                                   |
| 10 | J22_1868036_x2 | 100.0% | -----CCGGCCGGGGGGCGGACTGGGA-----                                                                     |
| 11 | J18_152301_x2  | 100.0% | -----TGCCGGCCGGGGGGCGGA-----                                                                         |
| 12 | J18_217876_x1  | 100.0% | -----CCGGGGGGCGGACTGGGA-----                                                                         |
| 13 | J18_180736_x1  | 100.0% | -----GGGGGCGGACTGGGAACG-----                                                                         |
| 14 | J24_4858065_x1 | 100.0% | -----GGACTGGGAACGGGCCTTCCGGGG-----                                                                   |

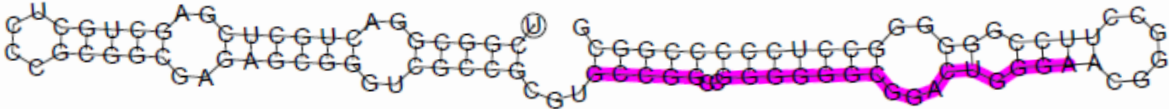

Supplement: S2 (10.1371/journal.pone.0083727.s002) [file journal.pone.0083727.s002]
